# Supplementary material for: PRINCESS: comprehensive detection of haplotype resolved SNVs, SVs, and methylation
Source: Genome Biol. 2021 Sep 14;22:268. doi: 10.1186/s13059-021-02486-w (PMC8442460; doi:10.1186/s13059-021-02486-w)
Supplement: Supplementary file 9 — Additional file 9: Table S8. Sample HS1011 variant intersection with repeat regions. [file 13059_2021_2486_MOESM9_ESM.xlsx]

## Sheet: TableS13_HS1011_variant_vs_repe
1- Unfiltered SNVs from long-reads and their intersection with repeats for HS1011.
	SNVs	Intersect repeats	Distribution
			Point mutation	Insertions	Deletions
ONT	81598780	4,004,949 (4.91%)	1,383,989 (34.55%)	563,614 (14.07%)	2,043,465 (51.02%)
2- SNVs identified from different technologies intersecting with repeat regions for HS1011.
	SNVs	SNVs intersects with simple repeats Percent		Distribution
				Point mutation	Insertion	Deletions
ONT	4156673	259,886 (6.25%)		210,428 (80.96%)	24,105 (9.27%)	25,353 (9.75%)
3- SVs Breakpoint from different technologies intersecting with repeat regions.
	# SVs	# Intersect with simple repeats Percent %		Invariant distribution
				DEL	DUP	INS	INV	TRA
ONT	20979	13,352 (63.64%)		6,138 (45.97%)	268 (2.00%)	6,354 (47.58%)	126 (0.94%)	466 (3.49%)
